# Supplementary material for: Overexpression of miR-210 and its significance in ischemic tissue damage
Source: Springer Nature journal article supplement (doi:10.1038/s41598-017-09763-4), 2017-08-21
Supplement: MOESM1 [file 41598_2017_9763_MOESM1_ESM.pdf]

**Title:**

**Overexpression of miR-210 and its significance in ischemic tissue damage**

Zaccagnini G.<sup>1</sup>, Maimone B.<sup>1</sup>, Fuschi P.<sup>1</sup>, Maselli D.<sup>2</sup>, Spinetti G.<sup>2</sup>, Gaetano C.<sup>3</sup>, Martelli F.<sup>1\*</sup>

<sup>1</sup> Laboratory of Molecular Cardiology, Policlinico San Donato-IRCCS, 20097 San Donato Milanese, Milan, Italy.

<sup>2</sup> Laboratory of Cardiovascular Research, MultiMedica-IRCCS, 20138 Milan, Italy.

<sup>3</sup> Division of Cardiovascular Epigenetics, Department of Cardiology, Internal Medicine Clinic III, Goethe University, Frankfurt am Main, Germany.

\*Correspondence should be addressed to Fabio Martelli (email: [fabio.martelli@grupposandonato.it](mailto:fabio.martelli@grupposandonato.it))

**Short title: miR-210 transgenic mice are protected from ischemic damage**

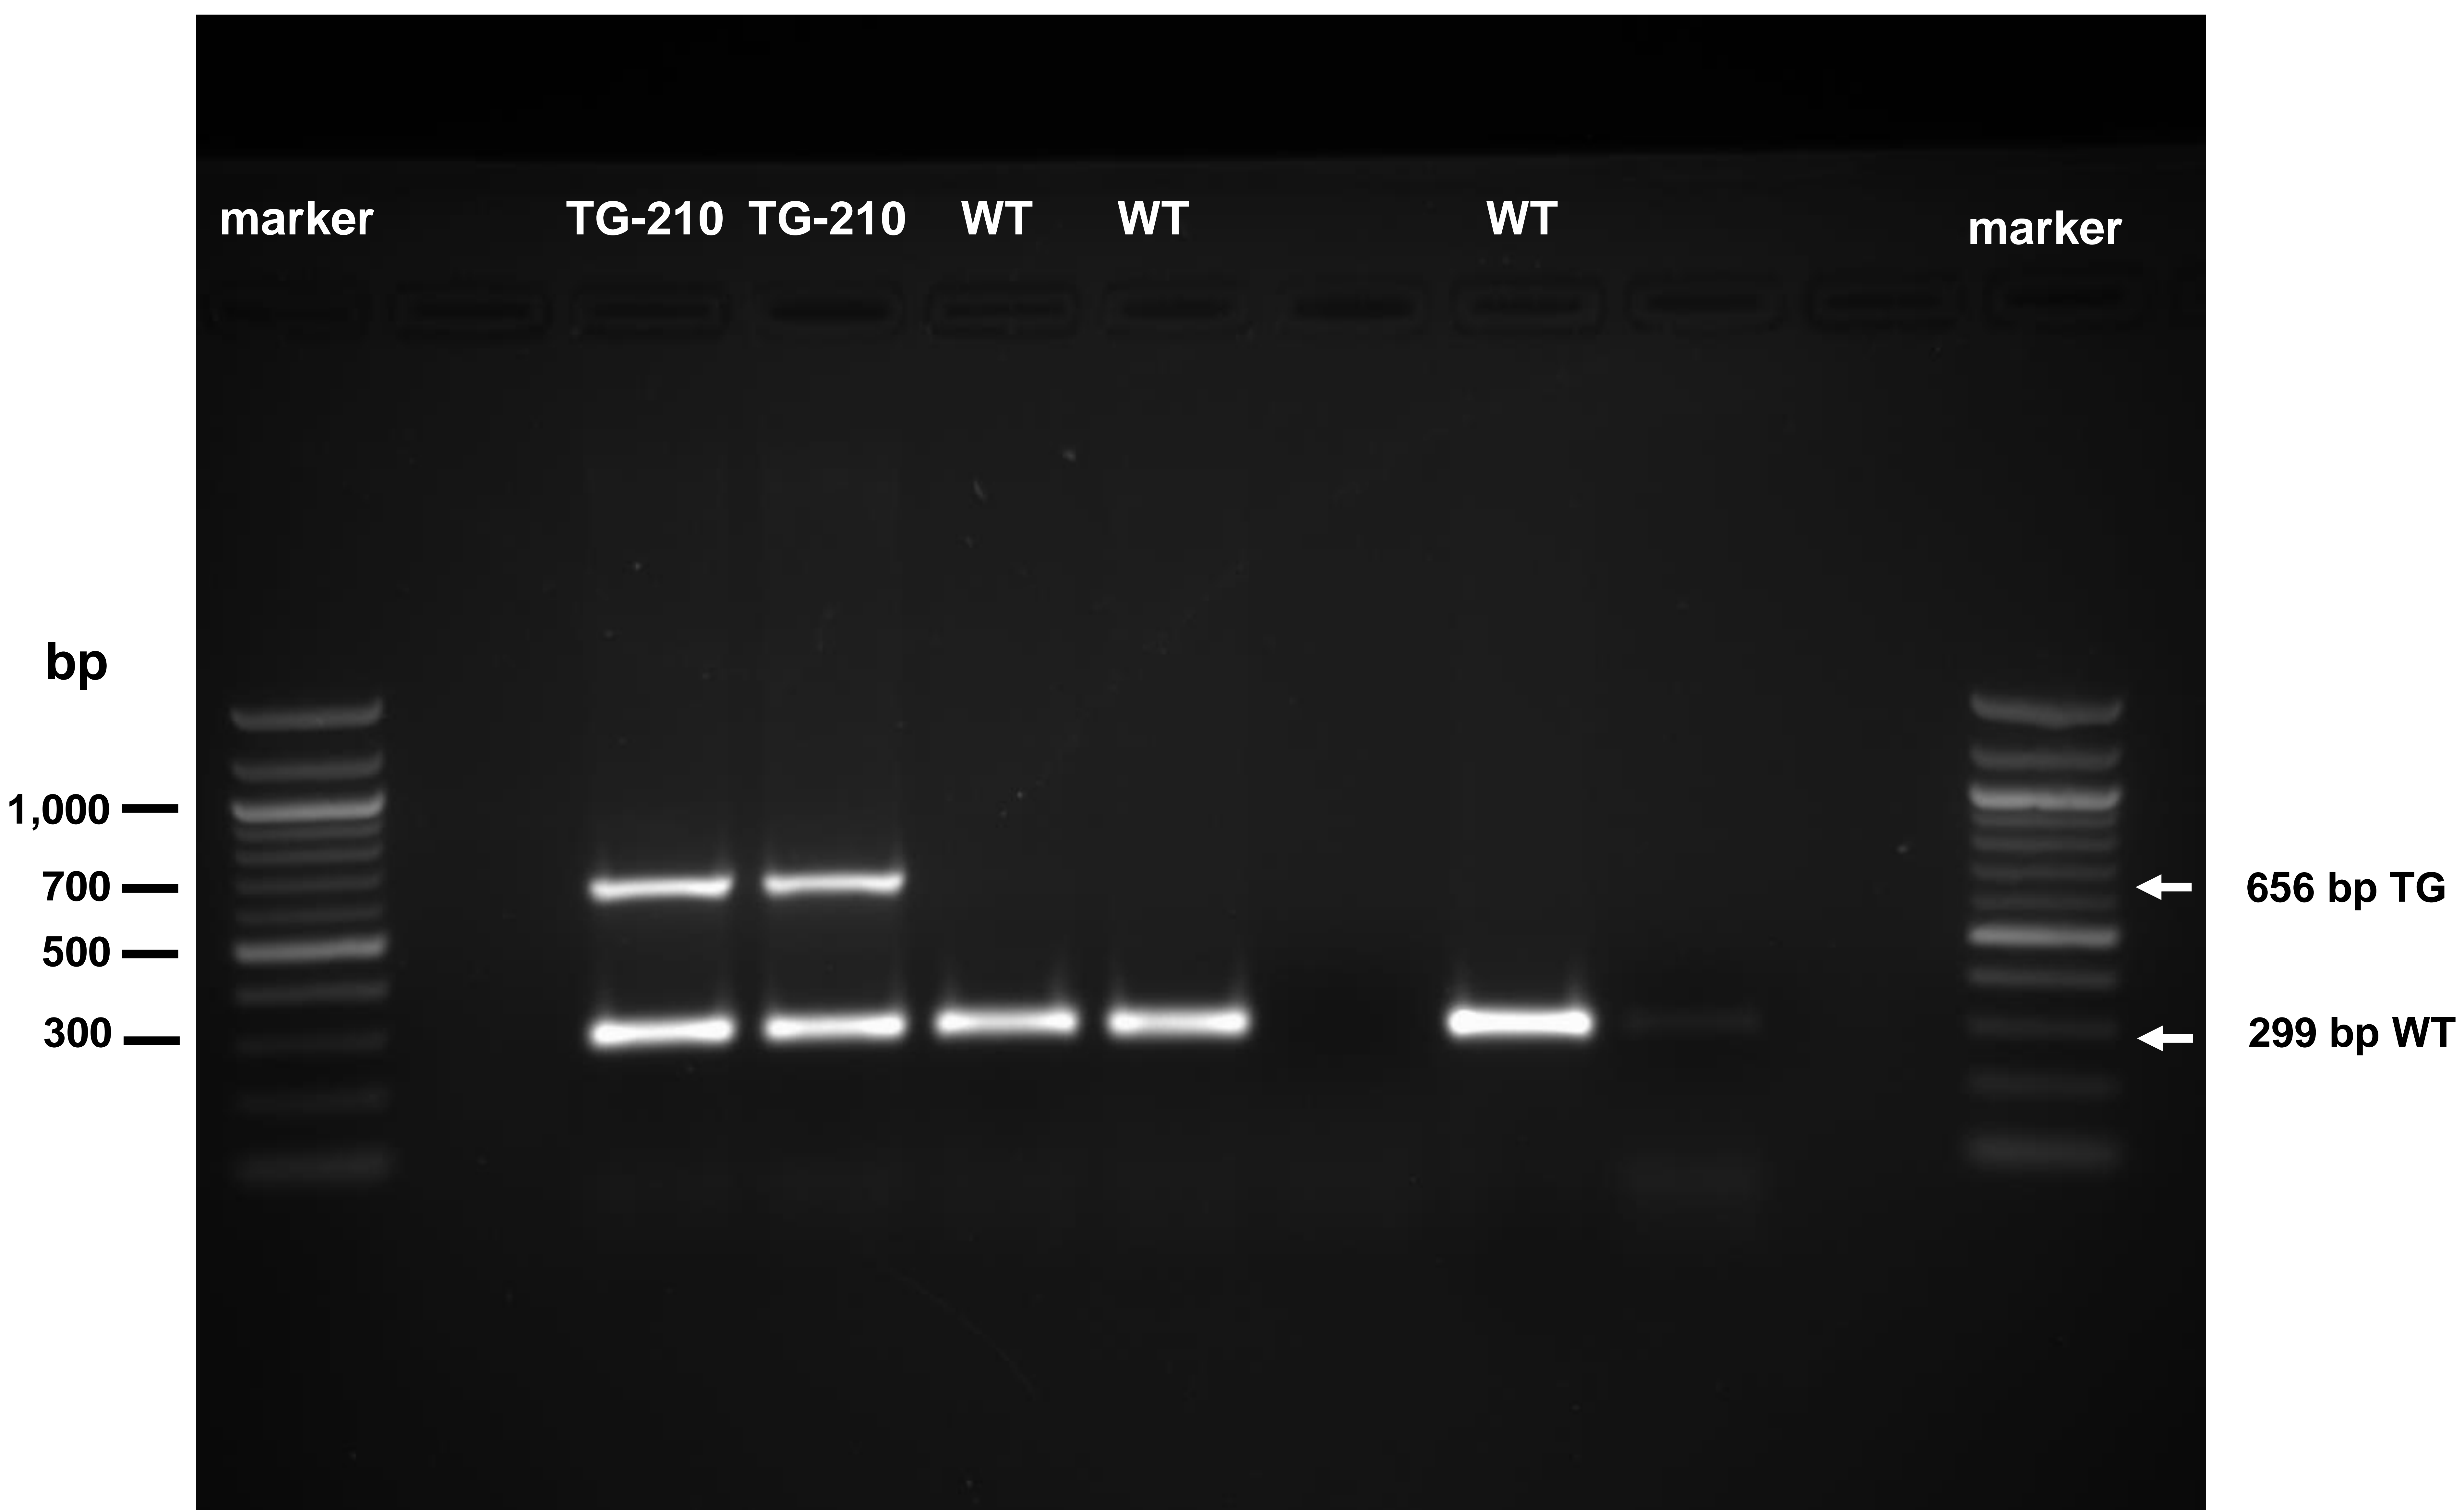

Supplementary figure 1. Full length gel of Fig.1 c. The representative gel shows a 299 base pair WT band in all mice and a 656 base pair band present in heterozygous TG-210 mice.
